# Supplementary material for: Modulation of the electronic properties and spin polarization of 2H VS2 nanoribbons by tuning ribbon widths and edge decoration
Source: Royal Society of Chemistry journal article supplement (doi:10.1039/c9cp02933h), 2019-01-01
Supplement: c9cp02933h1.pdf [file c9cp02933h1.pdf]

## Supporting Information for

### Modulation of electronic properties and spin polarization of 2H VS<sub>2</sub> nanoribbons by tuning ribbons widths and edge decoration

Rumeng Zhao<sup>ab</sup>, Tianxing Wang<sup>b\*</sup>, Mingyu Zhao<sup>c</sup>, Congxin Xia<sup>b\*</sup>, Yipeng An<sup>b</sup>, Xianqi Dai<sup>b</sup>

<sup>a</sup> *School of Physics, Beihang University, Beijing, 100191, China*

<sup>b</sup> *School of Physics and Materials Science, Henan Normal University, Xinxiang, Henan 453600, China*

<sup>c</sup> *School of Physics, Southeast University, Nanjing, 211189, China*

Fig. S1 Four representative magnetic configurations of VS<sub>2</sub>: (a) FM, (b) AF-stripy, (c) AF-Neel and (d) AF-zigzag. The positive and negative symbols stand out two opposite spin directions of V atoms along the out-of-plane direction.

Fig. S2 The function of magnetic susceptibility  $\chi_m$  and phase transition temperature  $T_C$  of  $n = 20$  zigzag 2H VS<sub>2</sub> nanoribbons with terminated edge of hydrogenated S systems.

Fig. S3 The calculated band structures of zigzag and armchair VS<sub>2</sub> nanoribbons with different edges and widths ( $n = 4, 5, 6, 7, 8, 10, 13, 15, 20$ ), respectively.

Fig. S4 The spin charge density distributions of zigzag and armchair VS<sub>2</sub> nanoribbons. The isosurface value for all the cases is taken as  $0.03 \text{ e}\text{\AA}^{-3}$ . The green (blue) indicates the positive (negative) distribution values.

Table. S1 The edge or sub-edge bonds of zigzag and armchair VS<sub>2</sub> nanoribbons with different terminated edges and widths (n = 4, 5, 6, 7, 8, 10, 13, 15, 20).

Table. S2 Total energies in the FM ( $E_{\text{FM}}$ ) and different AFM states ( $E_{\text{AFM-neel}}$ ,  $E_{\text{AFM-zigzag}}$ , and  $E_{\text{AFM-stripy}}$ ) of zigzag 2H VS<sub>2</sub> nanoribbons with terminated edge of hydrogenated S systems and different widths (n = 4, 5, 6, 7, 8, 10, 13, 15, 20).

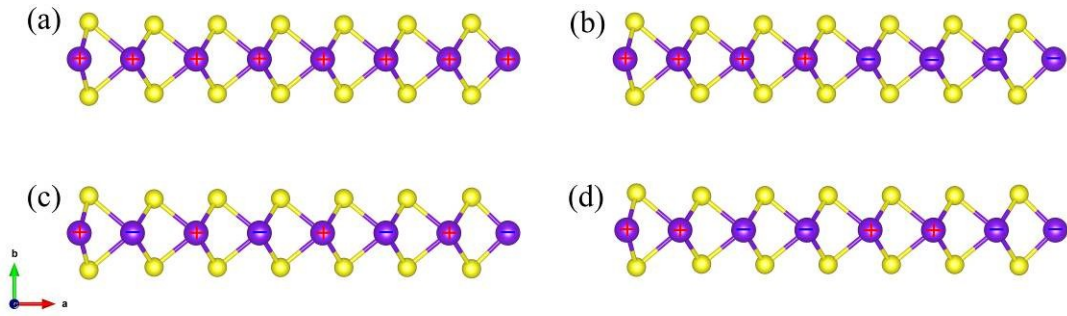

Figure S1. Four representative magnetic configurations of VS<sub>2</sub>: (a) FM, (b) AF-stripy, (c) AF-Neel and (d) AF-zigzag. The positive and negative symbols stand out two opposite spin directions of V atoms along the out-of-plane direction.

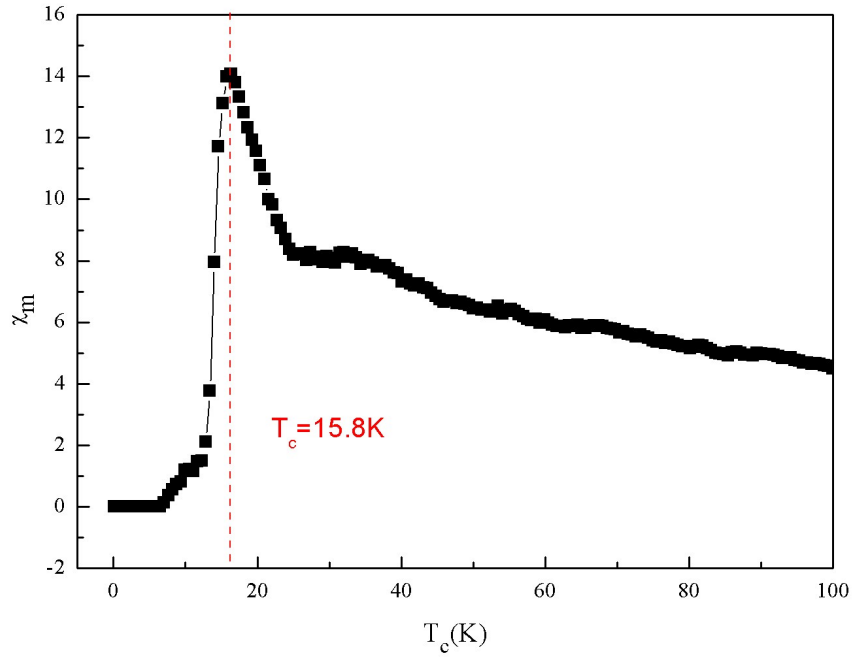

Fig. S2 The function of magnetic susceptibility  $\chi_m$  and phase transition temperature  $T_C$  of  $n = 20$  zigzag 2H  $VS_2$  nanoribbons with terminated edge of hydrogenated S systems.

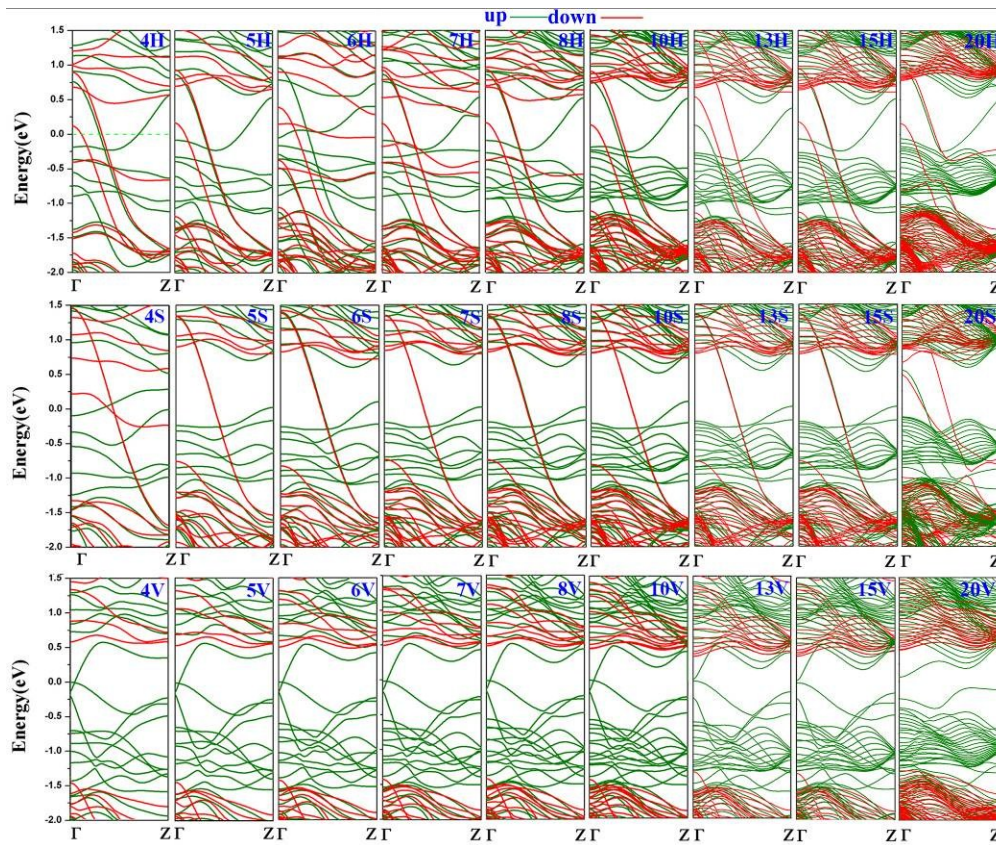

Fig. S3 The calculated band structures of zigzag and armchair  $\text{VS}_2$  nanoribbons with different edges and widths ( $n=4, 5, 6, 7, 8, 10, 13, 15, 20$ ), respectively.

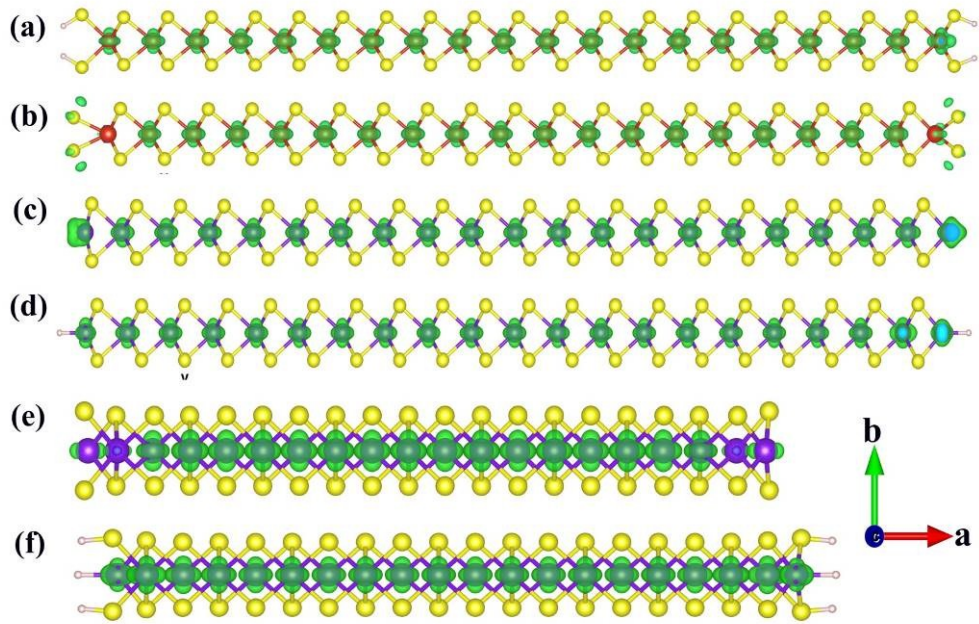

Fig. S4 The spin charge density distributions of zigzag and armchair VS<sub>2</sub> nanoribbons. The isosurface value for all the cases is taken as 0.03 eÅ<sup>-3</sup>. The green (blue) indicates the positive (negative) distribution values.

| Types    | terminated edge |          | 4     | 5    | 6    | 7    | 8    | 10   | 13   | 15   | 20   |      |
|----------|-----------------|----------|-------|------|------|------|------|------|------|------|------|------|
| Zigzag   | H_S             | edge     | 2.37  | 2.38 | 2.38 | 2.38 | 2.38 | 2.37 | 2.38 | 2.38 | 2.38 |      |
|          |                 | Sub-edge | 2.35  | 2.35 | 2.36 | 2.35 | 2.35 | 2.36 | 2.35 | 2.35 | 2.35 |      |
|          | S               | edge     | 2.36  | 2.37 | 2.37 | 2.37 | 2.37 | 2.38 | 2.37 | 2.37 | 2.37 |      |
|          |                 | Sub-edge | 2.33  | 2.33 | 2.33 | 2.33 | 2.33 | 2.33 | 2.33 | 2.33 | 2.33 |      |
|          | H_V             | edge     | 2.14  | 2.15 | 2.15 | 2.15 | 2.15 | 2.16 | 2.15 | 2.15 | 2.15 |      |
|          |                 | Sub-edge | 2.46  | 2.45 | 2.44 | 2.45 | 2.45 | 2.44 | 2.45 | 2.45 | 2.45 |      |
|          | V               | edge     | 2.30  | 2.30 | 2.30 | 2.30 | 2.30 | 2.30 | 2.30 | 2.30 | 2.29 | 2.30 |
|          |                 | Sub-edge | 2.36  | 2.36 | 2.36 | 2.36 | 2.36 | 2.36 | 2.36 | 2.36 | 2.36 | 2.36 |
|          | Armchair        | H_(S, V) | Edge1 | 2.24 | 2.26 | 2.25 | 2.26 | 2.24 | 2.25 | 2.26 | 2.26 | 2.26 |
|          |                 |          | Edge2 | 2.45 | 2.46 | 2.54 | 2.45 | 2.55 | 2.55 | 2.45 | 2.45 | 2.45 |
| Sub-edge |                 |          | 2.39  | 2.38 | 2.38 | 2.40 | 2.37 | 2.38 | 2.38 | 2.40 | 2.40 |      |
| (S, V)   |                 | edge     | 2.15  | 2.17 | 2.28 | 2.17 | 2.17 | 2.17 | 2.17 | 2.17 | 2.17 |      |
|          |                 | Sub-edge | 2.36  | 2.35 | 2.21 | 2.35 | 2.35 | 2.35 | 2.35 | 2.35 | 2.34 |      |
|          |                 | Sub-edge | 2.43  | 2.40 | 2.33 | 2.40 | 2.40 | 2.40 | 2.39 | 2.39 | 2.39 |      |

Table. S1 The edge or sub-edge bonds of zigzag and armchair VS<sub>2</sub> nanoribbons with different terminated edges and widths (n = 4, 5, 6, 7, 8, 10, 13, 15, 20).

| S_H                      | 4      | 5       | 6       | 7       | 8       | 10      | 13      | 15      | 20      |
|--------------------------|--------|---------|---------|---------|---------|---------|---------|---------|---------|
| E <sub>neel</sub> (eV)   | -87.12 | -103.63 | -120.13 | -136.61 | -153.11 | -186.17 | -235.79 | -268.75 | -351.53 |
| E <sub>zigzag</sub> (eV) | -87.23 | -103.84 | -120.30 | -136.95 | -153.41 | -186.55 | -236.30 | -269.42 | -352.94 |
| E <sub>stripy</sub> (eV) | -87.23 | -103.80 | -120.46 | -137.08 | -153.67 | -186.35 | -236.72 | -269.94 | -352.52 |
| E <sub>FM</sub> (eV)     | -88.93 | -104.27 | -120.90 | -137.49 | -154.10 | -187.34 | -236.80 | -270.35 | -353.09 |

Table. S2 Total energies in the FM (E<sub>FM</sub>) and different AFM states (E<sub>AFM-neel</sub>, E<sub>AFM-zigzag</sub>, and E<sub>AFM-stripy</sub>) of zigzag 2H VS<sub>2</sub> nanoribbons with terminated edge of hydrogenated S systems and different widths (n = 4, 5, 6, 7, 8, 10, 13, 15, 20).
